# Supplementary material for: Decreased Enhancer-Promoter Proximity Accompanying Enhancer Activation
Source: PubMed Central journal article supplement (PMC6838673; doi:10.1016/j.molcel.2019.07.038), 2019-11-07
Supplement: mmc1.pdf [file mmc1.pdf]

**Molecular Cell, Volume 76**

## **Supplemental Information**

### **Decreased Enhancer-Promoter Proximity**

### **Accompanying Enhancer Activation**

**Nezha S. Benabdallah, Iain Williamson, Robert S. Illingworth, Lauren Kane, Shelagh Boyle, Dipta Sengupta, Graeme R. Grimes, Pierre Therizols, and Wendy A. Bickmore**

Supplemental Text and Figures

**A**

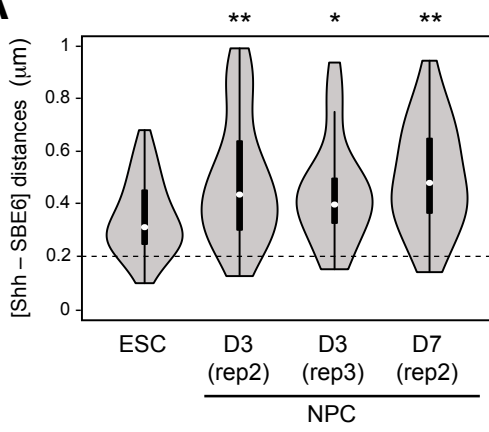

**B**

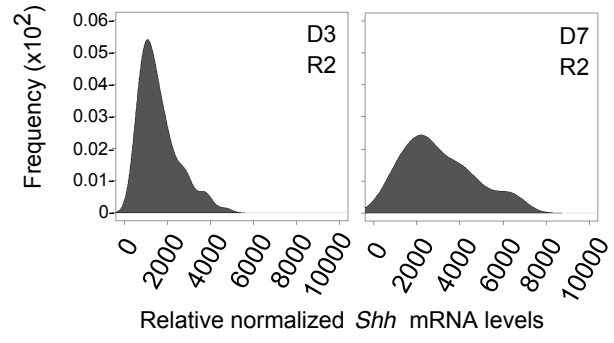

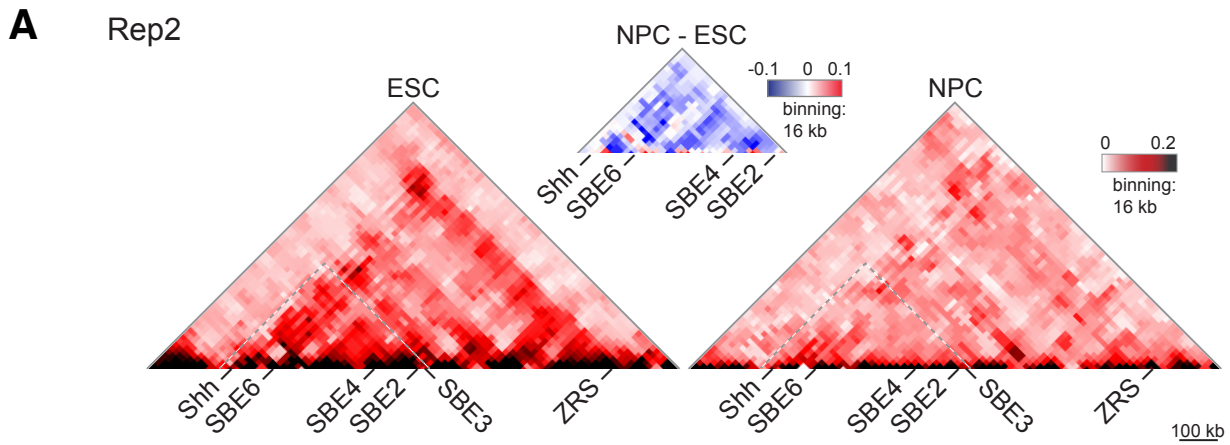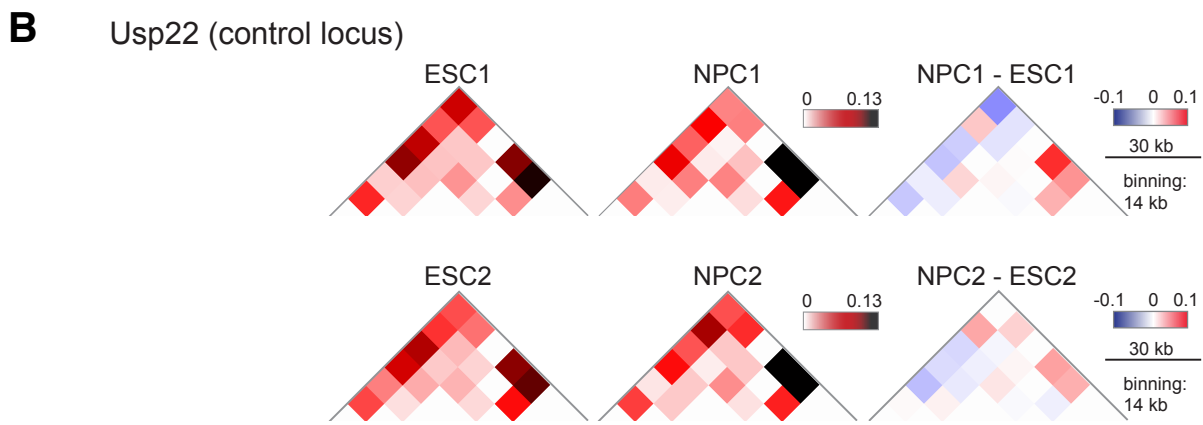

Figure S2

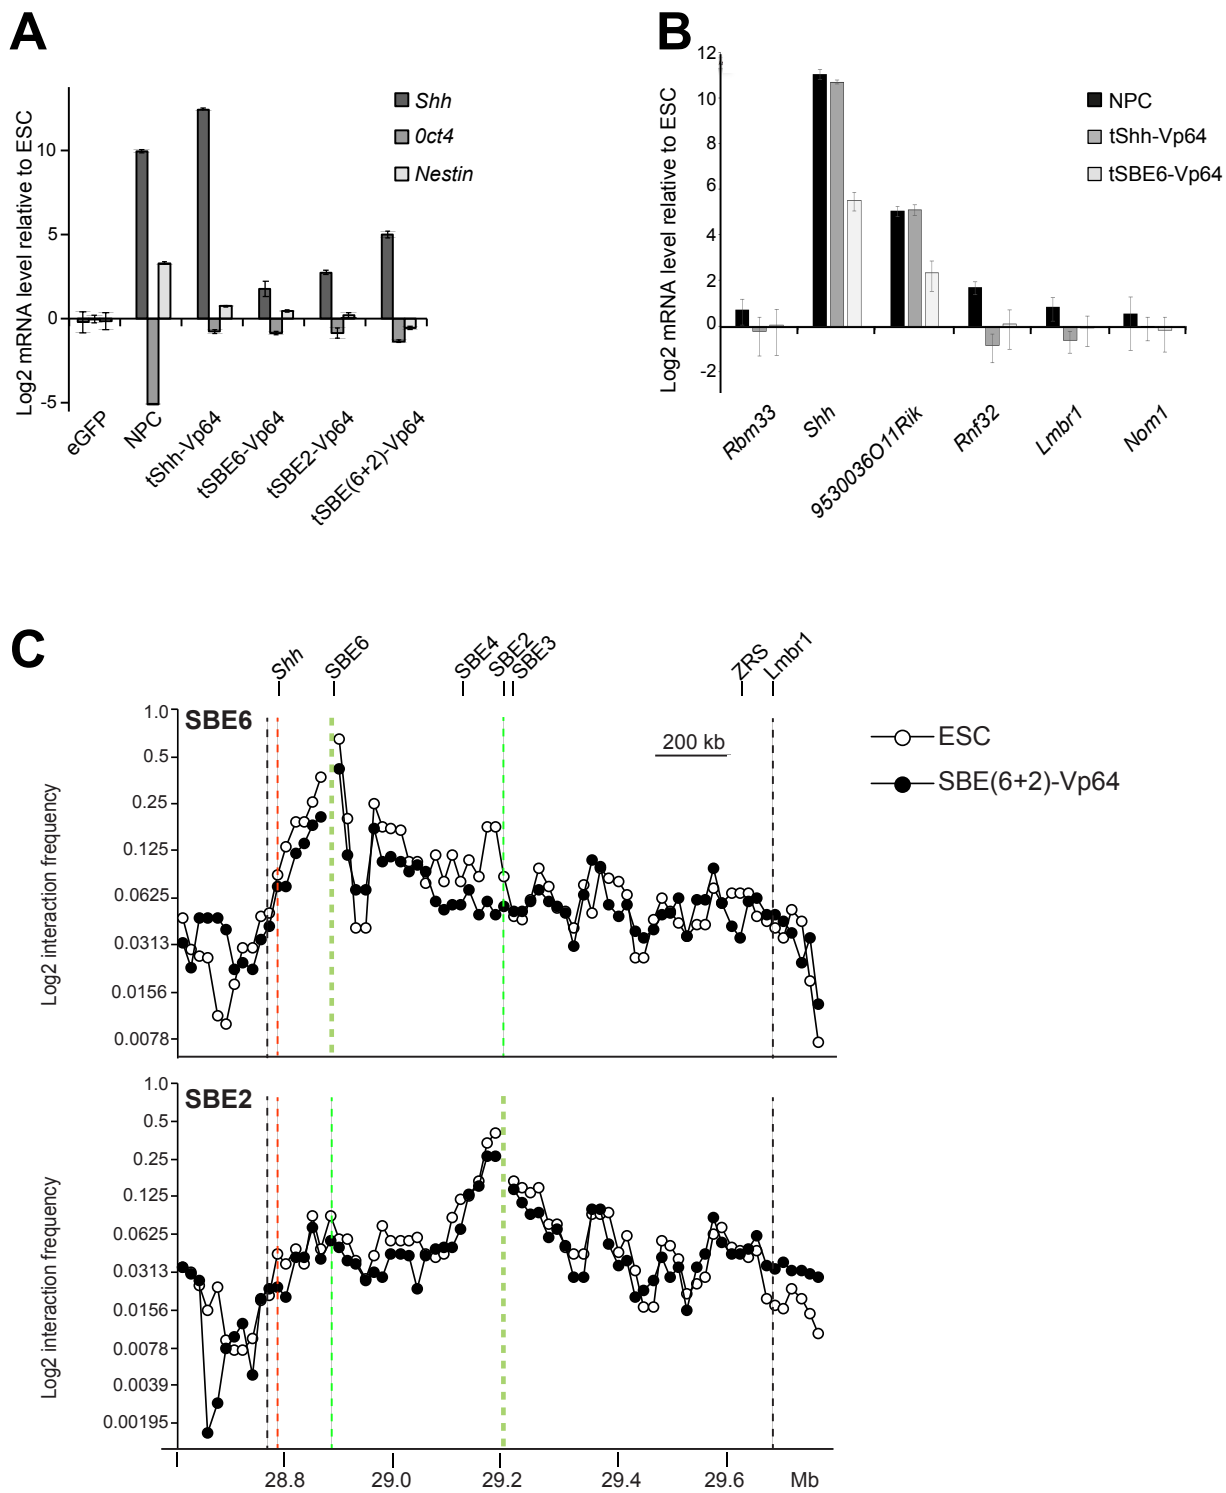

Figure S3

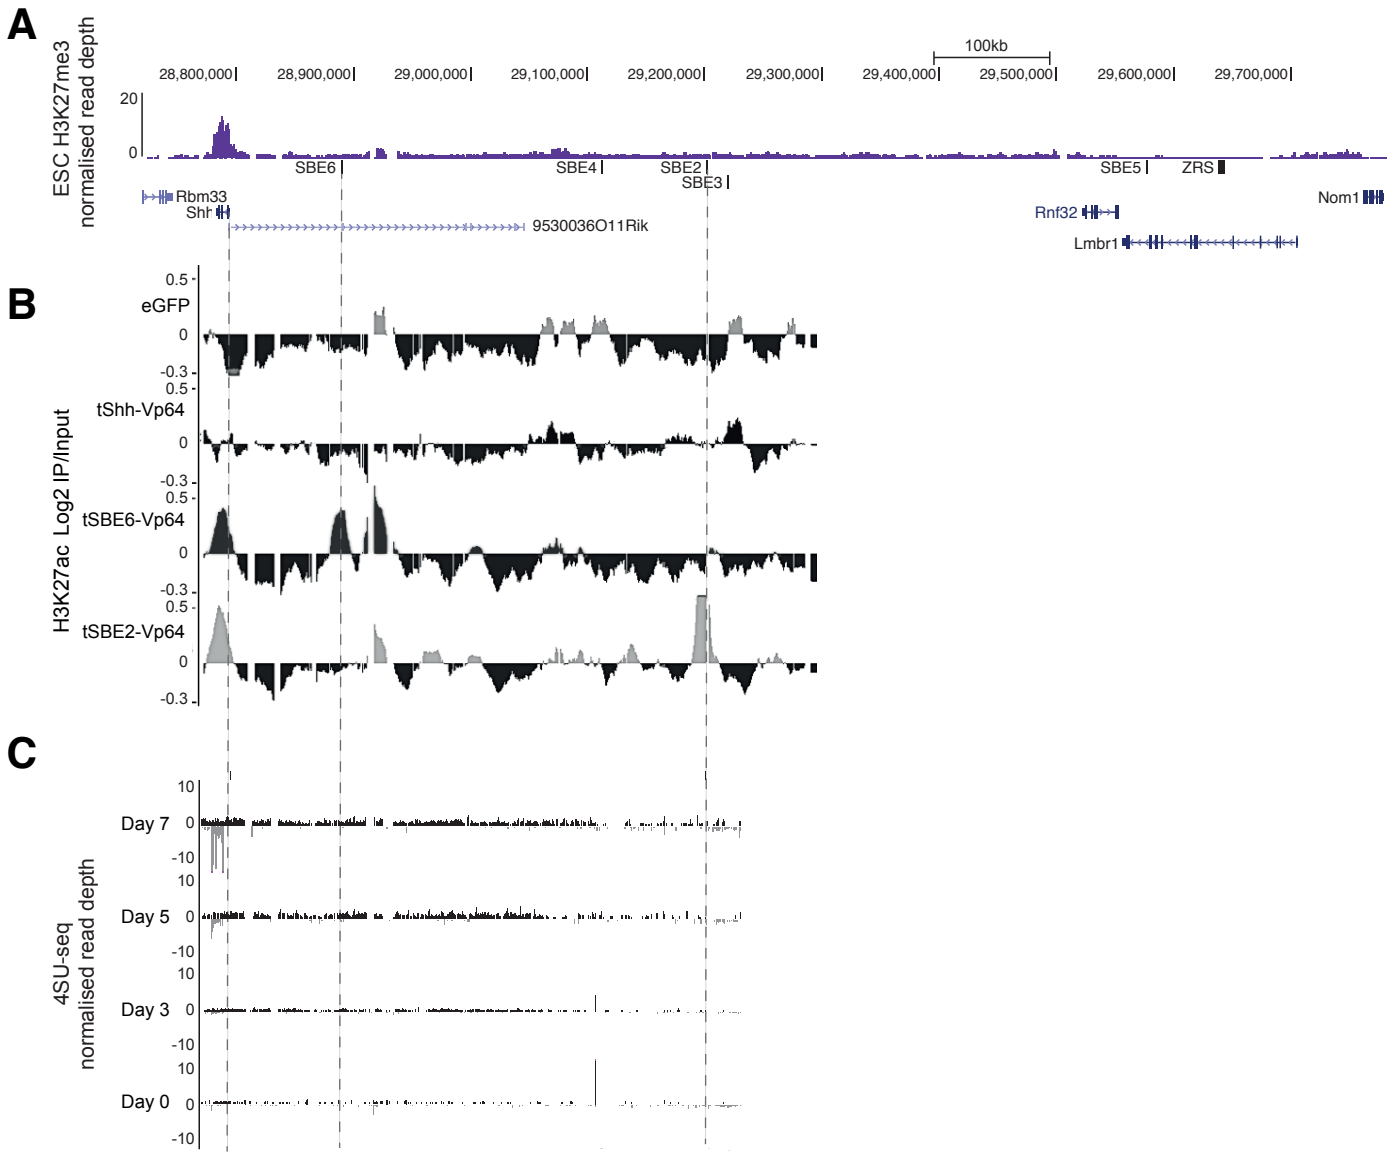

Supplementary Figure 4

Rep2

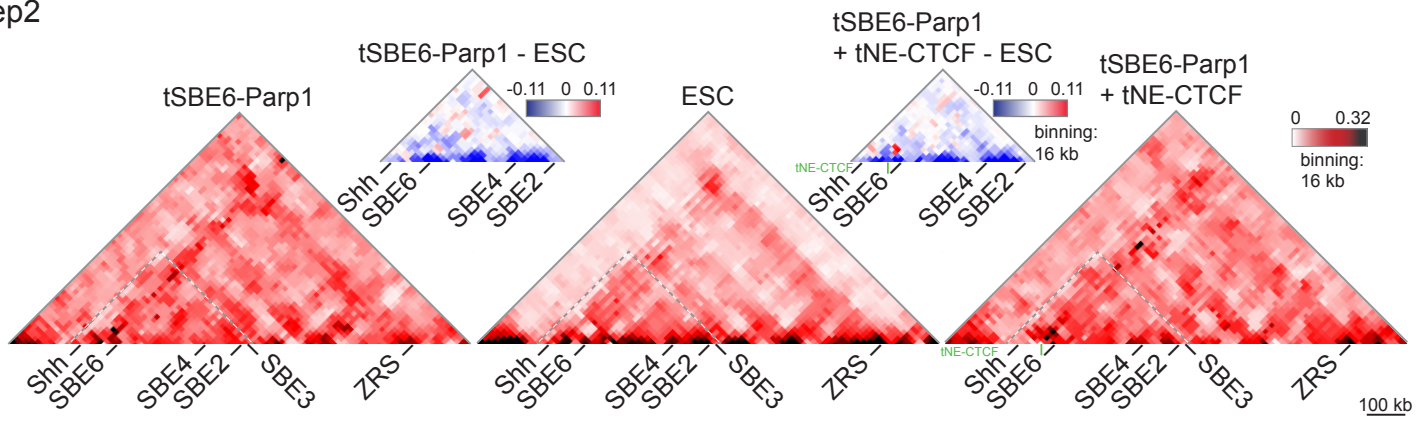

Figure S5

## Supplementary Figures

### ***Figure S1. FISH and Shh expression during NPC differentiation. Related to Figure 1.***

A) Violin plots representing Shh-SBE6 inter-probe distances after FISH in ESCs and in NPCs differentiated for 3 (D3) and 7 (D7) days of differentiation. Data are from the second (rep 2) and third (rep 3) biological replicates of the experiment shown in Figure 1. \*  $p < 0.05$ , \*\*  $p < 0.01$ . B) Kernel density plots showing *Shh* mRNA expression in single NPCs relative to *Gapdh* and normalised to expression in ESC at D3 and D7 of differentiation for a second biological replicate. Statistical data relating to FISH data from this figure are included in Table S1.

### ***Figure S2. Chromosome conformation capture of the Shh regulatory region. Related to Figure 2.***

A) 5C heat-maps from ESCs and NPCs for the *Shh* regulatory region (mm9, chr5:28604000-29780000) with 16kb binning and smoothing (biological replicate of experiment in Figure 2). Difference 5C plots are shown above the main 5C plots. B) 5C heat maps from the control *Usp22* locus.

### ***Figure S3. Inducing Shh expression in ESCs does not perturb pluripotency. Related to Figure 3.***

A) qRT-PCR showing mean ( $\pm$  SEM) log<sub>2</sub> mRNA levels of *Shh*, *Oct4* and *Nestin* relative to *Gapdh* and normalized to eGFP expressing ESCs, in NPCs and in ESCs expressing tShh-Vp64, tSBE6-Vp64, tSBE2-Vp64 and tSBE(6+2)-Vp64. Data are from one biological replicate. B) As in (A) but for genes from the *Shh* TAD and the flanking TADs. Data in A and B relate to main Figure 3. C) Virtual 4C visualisation of 5C data from main Figure 3E, for ESCs and for ESCs expression SBE(6+2)-Vp64 with SBE6 and SBE2 viewpoints. Genome co-ordinates (Mb) are from the mm9 assembly of the mouse genome.

### ***Figure S4. Chromatin and transcription profiling of the Shh regulatory region. Related to Figure 3.***

A) Normalised read counts for H3K27me3 ChIP-seq across the *Shh* regulatory region. The position of *Shh* enhancers (SBE2-6 and ZRS) as well as the position of genes in the region is shown below the ChIP track. Genome co-ordinates are from the mm9 assembly of the mouse genome. NCBI GEO accession number for these data: GSE89512. Data are from Illingworth et al., 2015; GEO accession [GSE69955](#). B) Log<sub>2</sub> ratio H3K27ac ChIP: input of MNase digested chromatin, hybridised to an array covering the

Shh regulatory region. Mapping is aligned to the genome browser track shown in (A). Data are from; ESCs expressing control eGFP, or TALE-Vp64 fusions targeting the *Shh* promoter (tShh-Vp64), SBE6 (tSBE6-Vp64) or SBE2 (tSBE2-Vp64). Dotted lines represent location of the *Shh* promoter, SBE6 and SBE2. NCBI GEO accession number for these data: GSE89512. C) Normalised read counts for 4SU-seq during a time course of NPC differentiation from day 0 to day 7. Tracks are aligned to the genome co-ordinates in (A). NCBI GEO accession number for these data: GSE115774.

***Figure S5. Chromosome conformation capture of the Shh regulatory region in wild type, tSBE6-PARP1 and tSBE6-PARP1 + tNE-CTCF ESCs. Related to Figure 6.***

Biological replicate for experiment in Figure 6G. 5C heatmaps of the *Shh* regulatory region (mm9, chr5: 28604000-29780000) with 16kb binning and smoothing. Difference 5C plots are shown above the main 5C plots.



**Table S1, Mann-Whitney U significance tests for inter-probe FISH distances across the Shh regulatory domain during NPC differentiation. Related to Figure 1**

Table showing the *p*-values of each biological replicate for differences between the inter-probe distances from ESCs against the data from various days of NPC differentiation. Values in bold are significant ( $p < 0.05$ ). Also shown are the % alleles (probe pairs) where probes are considered co-localised (i.e. distances of  $< 200\text{nm}$ ) for data from ESCs and NPCs. 40 to 100 loci were analysed per experiment. Unless otherwise indicated, imaged were captured using structured illumination microscopy (SIM).

| Probe pairs        | Day of NPC differentiation | <i>p</i>         | Imaging mode | % of probe pair $< 200\text{nm}$ in ESCs | % of probe pair $< 200\text{nm}$ in NPCs |
|--------------------|----------------------------|------------------|--------------|------------------------------------------|------------------------------------------|
| <b>Shh-SBE6</b>    | <b>3</b>                   | 0.55             | SIM          | 26.3                                     | 25.4                                     |
|                    |                            | <b>0.018</b>     | SIM          | 11.5                                     | 7.5                                      |
|                    |                            | <b>0.002</b>     | SIM          | 11.5                                     | 9.7                                      |
| <b>Shh-SBE6</b>    | <b>4</b>                   | <b>0.011</b>     | SIM          | 26.3                                     | 18.1                                     |
| <b>Shh-SBE6</b>    | <b>5</b>                   | <b>&lt;0.001</b> | SIM          | 26.3                                     | 13.5                                     |
| <b>Shh-SBE6</b>    | <b>6</b>                   | <b>&lt;0.001</b> | SIM          | 26.3                                     | 11.0                                     |
| <b>Shh-SBE6</b>    | <b>7</b>                   | <b>0.033</b>     | SIM          |                                          |                                          |
|                    |                            | <b>0.020</b>     | SIM          |                                          |                                          |
|                    |                            | <b>0.003</b>     | SIM          |                                          |                                          |
|                    |                            | <b>0.002</b>     | SIM          |                                          |                                          |
|                    |                            | <b>&lt;0.001</b> | SIM          | 26.3                                     | 19,2                                     |
|                    |                            | <b>&lt;0.001</b> | SIM          | 11.5                                     | 4.3                                      |
|                    |                            | <b>&lt;0.001</b> | SIM          | 25.3                                     | 9.1                                      |
|                    |                            | <b>&lt;0.001</b> | SIM          | 7.8                                      | 3.8                                      |
|                    |                            | <b>&lt;0.001</b> | SIM          | 15.8                                     | 3.9                                      |
| <b>&lt;0.001</b>   | SIM                        | 26               | 3.6          |                                          |                                          |
| <b>&lt;0.001</b>   | SIM                        | 13.6             | 4.9          |                                          |                                          |
| <b>Shh-SBE4</b>    | <b>7</b>                   | <b>0.018</b>     | Widefield    |                                          |                                          |
|                    |                            | <b>0.015</b>     | Widefield    |                                          |                                          |
|                    |                            | <b>&lt;0.001</b> | SIM          | 23.8                                     | 6.6                                      |
|                    |                            | <b>&lt;0.001</b> | SIM          | 10.6                                     | 5.4                                      |
| <b>Shh-SBE2/3</b>  | <b>7</b>                   | 0.946            | SIM          |                                          |                                          |
|                    |                            | 0.644            | SIM          | 17.5                                     | 18                                       |
|                    |                            | 0.529            | SIM          |                                          |                                          |
|                    |                            | 0.493            | SIM          |                                          |                                          |
| <b>Shh-ZRS</b>     | <b>7</b>                   | 0.057            | Widefield    |                                          |                                          |
|                    |                            | 0.656            | SIM          |                                          |                                          |
|                    |                            | 0.594            | SIM          |                                          |                                          |
|                    |                            | 0.388            | SIM          |                                          |                                          |
| <b>Shh-Control</b> | <b>7</b>                   | 0.680            | Widefield    | Widefield                                | Widefield                                |
|                    |                            | 0.432            | SIM          |                                          |                                          |

**Table S2. Mann-Whitney U significance tests for Shh-SBE6 inter-probe distances between eGFP and TALE-Vp64/TALE-Vp128 transfected cells. Related to Figure 3.**

*p*-values of each biological replicate of the data from Figures 3C and D are shown for the differences between the inter-probe distances from ESCs expressing a control eGFP construct and the data from ESCs expressing TALE-Vp64/Vp128 constructs. Values in bold are significant ( $p < 0.05$ ). Also shown are the % alleles (probe pairs) where probes are considered co-localised (i.e. distances of  $< 200\text{nm}$ ).

| TALE-Vp64/Vp128 constructs | Shh-SBE6<br><i>p</i> value | % of probe pair<br><200nm in eGFP control | % probe pairs<br><200nm in TALE-fusions |
|----------------------------|----------------------------|-------------------------------------------|-----------------------------------------|
| tShh-Vp128                 | 0.440                      | 26.6                                      | 35.8                                    |
|                            | 0.073                      | 31.5                                      | 8.9                                     |
| tSBE6-Vp128                | <b>0.001</b>               | 31.5                                      | <b>7.5</b>                              |
| tSBE2-Vp128                | <b>0.0021</b>              | <b>22.2</b>                               | <b>1.8</b>                              |
|                            | <b>&lt;0.001</b>           | 31.5                                      | <b>0</b>                                |
| tSBE(6+2)-Vp64             | <b>0.045</b>               | <b>8.4</b>                                | <b>5.6</b>                              |
|                            | <b>0.013</b>               | <b>28.3</b>                               | <b>9.6</b>                              |
|                            | <b>&lt;0.001</b>           | <b>32.9</b>                               | <b>3.6</b>                              |
|                            | <b>&lt;0.001</b>           | <b>25.7</b>                               | <b>2.9</b>                              |
|                            | <b>&lt;0.001</b>           | <b>29.5</b>                               | <b>3.5</b>                              |
|                            | <b>&lt;0.001</b>           | <b>31.1</b>                               | <b>18.4</b>                             |
|                            | <b>&lt;0.001</b>           | <b>25.7</b>                               | <b>2.9</b>                              |
|                            | <b>&lt;0.001</b>           | <b>30.8</b>                               | <b>4.1</b>                              |
| tSBE(6+2)-Δ                | 0.228                      | 28.3                                      | 28.3                                    |

**Table S3, Mann-Whitney U significance tests for Shh-SBE6 inter-probe distances across the Shh regulatory domain after expression of TALE-LDB1. Related to Figure 3.**

Table showing the *p*-values of each biological replicate for differences between the inter-probe distances between the data from ESCs expressing a control eGFP construct and the data from ESCs expressing TALE-LDB1 constructs. Data are from Figures 3H and I. Values in bold are significant ( $p < 0.05$ ). Also shown are the % of alleles (probe pairs) where probes are considered as co-localised (i.e. distances of  $< 200\text{nm}$ ) for data from ESCs and cells expressing the various TALE-LDB1 fusions.

| Probe pairs | TALE-LDB1 constructs   | <i>p</i> value   | % of probe pair<br><200nm in ESCs | % of probe pair <200nm<br>in TALE-LDB1 |
|-------------|------------------------|------------------|-----------------------------------|----------------------------------------|
| Shh-SBE6    | tShh-LDB1 + tSBE6-LDB1 | <b>0.022</b>     | 36.3                              | 54.4                                   |
|             | tShh-LDB1 + tSBE2-LDB1 | 0.457            | 17.7                              | 21.2                                   |
|             |                        | 0.167            | 22.6                              | 17.2                                   |
| Shh-SBE2/3  | tShh-LDB1 + tSBE2-LDB1 | <b>0.017</b>     | 22.1                              | 34.8                                   |
|             |                        | <b>&lt;0.001</b> | 18.6                              | 45.5                                   |
|             |                        | <b>&lt;0.001</b> | 10.5                              | 35.1                                   |
| SBE6-SBE2/3 | tShh-LDB1+tSBE2-LDB1   | 0.895            | 29.1                              | 19.4                                   |
|             |                        | 0.198            | 28.8                              | 29.5                                   |
|             |                        | <b>0.018</b>     | 23.7                              | 48.8                                   |

**Table S4, Mann-Whitney U significance tests for Shh-SBE6 inter-probe distances after expression of TALE-VWA or SIX3. Related to Figure 4.**

*p*-values of each biological replicate of the data from Figure 4 are shown for the differences between the inter-probe distances from ESCs expressing a control eGFP construct and those from ESCs expressing TALE-VWA or Six3 constructs. Values in bold are significant (*p*<0.05). Also shown are the % alleles (probe pairs) where probes are considered co-localised (i.e. distances of <200nm).

| TALE-constructs | Shh-SBE6<br><i>p</i> value                           | % probe pairs<br><200nm in eGFP<br>control | % probe pairs<br><200nm in TALE-fusions |
|-----------------|------------------------------------------------------|--------------------------------------------|-----------------------------------------|
| tShh-VWA        | 0.359                                                | 17.4                                       | 20.4                                    |
| tSBE(6+2)-VWA   | <b>0.04</b><br><b>&lt;0.001</b>                      | 17.4<br><b>18.6</b>                        | <b>4.3</b><br><b>2.6</b>                |
| tShh-SIX3       | 0.594                                                | 22.6                                       | 29.6                                    |
| tSBE2-SIX3      | <b>0.012</b><br><b>&lt;0.001</b><br><b>&lt;0.001</b> | 22.6<br><b>20.6</b><br><b>33.3</b>         | <b>21.4</b><br><b>8.3</b><br><b>9.1</b> |

**Table S5, Mann-Whitney U significance tests for Shh-SBE6 inter-probe distances after expression of TALEs-that target NE. Related to Figure 5.**

*p*-values of each biological replicate are shown for the differences between the Shh-SBE6 inter-probe distances from ESCs expressing a control eGFP construct and from ESCs expressing various TALE-constructs. Data from Figure 5.

| TALE-constructs           | Shh-SBE6<br><i>p</i> value |
|---------------------------|----------------------------|
| tSBE(6+2)-Vp64 + tNE-CTCF | 0.626<br>0.602             |
| tSBE(6+2)-Vp64 + tNE-Δ    | 0.596<br>0.168             |
| tSBE(6+2)-VWA + tNE-Δ     | 0.627                      |

**Table S6. Mann-Whitney U significance tests for Shh-SBE6 inter-probe distances after TALE-fusion expression and after treatment with olaparib. Related to Figure 6.**

*p*-values of each biological replicate are shown for differences between the inter-probe distances from ESCs expressing a control eGFP construct against the data from ESCs expressing TALE constructs, or from NPCs treated with olaparib. Data relate to Figure 6C-F. Values in bold are significant ( $p < 0.05$ ).

| TALE-fusion constructs  | Shh-SBE6 <i>p</i> value                              |
|-------------------------|------------------------------------------------------|
| tSBE6-PARP1             | <b>0.001</b>                                         |
| tSBE6-PARP1 + tNE-CTCF  | 0.106                                                |
| tSBE2-PARP1             | <b>&lt;0.001</b><br><b>&lt;0.001</b>                 |
| tSBE2-PARP1 + tNE-CTCF+ | 0.883                                                |
| tSBE2-SIX3              | <b>0.012</b><br><b>&lt;0.001</b><br><b>&lt;0.001</b> |
| tSBE2-SIX3 + Olaparib   | 0.997<br>0.629<br>0.204                              |
| tSBE2-PARP1+Olaparib    | 0.816<br>0.680<br>0.417                              |
| NPC (d7) + Olaparib     | 0.799<br>0.546                                       |
| tShh-DEL                | <b>0.003</b>                                         |
| tSBE2-DEL               | <b>&lt;0.001</b><br><b>&lt;0.001</b>                 |
| tSBE2-DEL + Olaparib    | <b>&lt;0.001</b><br><b>&lt;0.001</b>                 |

**Table S7. Mann-Whitney U significance tests for Shh-SBE6 inter-probe FISH distances across the Shh regulatory domain after recruitment of wild-type and mutant PARP1. Related to Figure 6.**

*p*-values for the differences between the Shh-SBE6 inter-probe distances from ESCs expressing a control eGFP construct and from ESCs expressing various TALE-PARP1 fusion constructs, either wild-type PARP1, or catalytically inactive mutant PARP1s (E988K or D890K+M899N). Data relate to Figure 6H. Values in bold are significant ( $p < 0.05$ ).

| Probe pairs     | TALE-fusion constructs | <i>p</i> value   |
|-----------------|------------------------|------------------|
| <b>Shh-SBE6</b> | tSBE6-PARP1            | <b>&lt;0.001</b> |
|                 | tSBE2-PARP1            | <b>&lt;0.001</b> |
|                 | tSBE6-E988K            | 0.168<br>0.337   |
|                 | tSBE6-D890V+M899N      | 0.794<br>0.226   |
|                 | tSBE2-E988K            | 0.756<br>0.447   |
|                 | tSBE2-D890V+M899N      | 0.984<br>0.7414  |

**Table S8: Enhancer and FISH probe co-ordinates. Related to STAR Methods section 3D-FISH**

The table lists the genome co-ordinates (bp) on chromosome 5 (mm9 assembly of the mouse genome) of *Shh* and its enhancers, and the fosmid probes used for FISH.

| Locus  | Gene/<br>enhancer | Fosmid probes |          |                |             |
|--------|-------------------|---------------|----------|----------------|-------------|
|        |                   | start (bp)    | end (bp) | fosmid ID      | Clone name  |
| CTRL   |                   | 28411516      | 28449628 | G135P60453C9   | W11-2806K8  |
| Shh    | 28783380-28793641 | 28754458      | 28795879 | G135P64333A4   | W11-574O18  |
| SBE6   | 28889688-28890461 | 28887686      | 28924744 | G135P67311F4   | W11-442E17  |
| SBE4   | 29111752-29112865 | 29107140      | 29147593 | G135P600205H10 | W11-2751A06 |
| SBE2/3 | 29202018-29219606 | 29195832      | 29239355 | G135P603171G8  | W11-1275C09 |
| ZRS    | 29638200-29643599 | 29611727      | 29653695 | G135P600929F6  | W11-1047E14 |

**Table S9: Table of PCR primers for qRT-PCR and Chip qPCR. Related to STAR Methods section**

| qRT-PCR primers   |                         |
|-------------------|-------------------------|
| Gapdh Fw          | ATCACCATCTTCCAGGAGCGAG  |
| Gapdh Rv          | GACCCTTTTGGCTCCACCCTTC  |
| Oct4 (Pou5f1) Fw  | CGAGAACAATGAGAACCTTC    |
| Oct4 (Pou5f1) Rv  | CCTTCTCTAGCCCAAGCTGAT   |
| Nestin Fw         | GATCGCTCAGATCCTGGAAG    |
| Nestin Rv         | AGGTGTCTGCAAGCGAGAGT    |
| Shh Fw            | ACGATTTAAGGAACTCACCC    |
| Shh Rv            | TTGTCTTTGCACCTCTGAG     |
| 9530036011Rik Fw  | GCCTGAAACACACAGAATGC    |
| 9530036011Rik RV  | GATGGGAGAACTCAGCCAAG    |
| Parg Fw           | GAAGAAGTGGCTGGGAACTCCT  |
| Parg Rv           | GTTTCGGAACCTCTCCTGCTCT  |
| ChIP qPCR primers |                         |
| tNE Fw            | CAAGAAAACATGGGTCTAGGG   |
| tNE Rv            | TGAATTGGAACATTTCTTCAGG  |
| tShh Fw           | AAGGCTGGAGAGCTTGTGAG    |
| tShh Rv           | TAAAGCCACAGCAGCCAGAG    |
| Actin Fw          | CCTCGATGCTGACCCTCATCC   |
| Actin Rv          | GACACTGCCCCATTCAATGTCTC |

**Table S10: 5C sequencing technical and biological replicates reads. Related to STAR Methods section**

| Experiment                                                  | No. of reads | No. of used reads | No. of used reads<br><i>Shh</i> reg. region |
|-------------------------------------------------------------|--------------|-------------------|---------------------------------------------|
| ESC biological replicate 1 (tSBE-Vp64 experiments)          | 45,024,284   | 23,168,046        | 13,752,662                                  |
| ESC biological replicate 1                                  | 1,745,058    | 1,368,704         | 844,392                                     |
| ESC biological replicate 2                                  | 3,606,454    | 2,830,120         | 1,751,368                                   |
| NPC biological replicate 1-technical replicate 1            | 3,984,330    | 1,627,144         | 795,658                                     |
| NPC biological replicate 1-technical replicate 2            | 9,814,008    | 4,168,546         | 2,267,024                                   |
| NPC biological replicate 2-technical replicate 1            | 2,079,276    | 894,214           | 411,396                                     |
| NPC biological replicate 2-technical replicate 2            | 92,081,330   | 33,796,970        | 15,038,310                                  |
| NPC biological replicate 2-technical replicate 3            | 16,481,938   | 5,648,428         | 2,705,028                                   |
| tSBE6-Vp64 biological replicate 1                           | 90,452,930   | 50,035,502        | 30,790,810                                  |
| tSBE2-Vp64 biological replicate 1                           | 1.01E+08     | 44,074,854        | 21,016,670                                  |
| tSBE(6+2)-Vp64 biological replicate 1-technical replicate 2 | 79,792,180   | 32,329,736        | 16,415,488                                  |
| tSBE6-PARP1 biological replicate 1                          | 2,066,022    | 1,002,156         | 562,782                                     |
| tSBE6-PARP1 biological replicate 2                          | 1,664,928    | 1,255,928         | 728,276                                     |
| tSBE6-PARP1 + tNE-CTCF biological replicate 1               | 2,478,062    | 1,873,946         | 1,173,160                                   |
| tSBE6-PARP1 + tNE-CTCF biological replicate 2               | 1,604,560    | 1,231,786         | 706,104                                     |
